# Supplementary material for: The multi-output incoherent feedforward loop constituted by the transcriptional regulators LasR and RsaL confers robustness to a subset of quorum sensing genes in Pseudomonas aeruginosa
Source: Royal Society of Chemistry journal article supplement (doi:10.1039/c7mb00040e), 2017-04-20
Supplement: c7mb00040e1.pdf [file c7mb00040e1.pdf]

**The multi-output incoherent feedforward loop constituted by the transcriptional regulators LasR and RsaL confers robustness to a subset of quorum sensing genes in *Pseudomonas aeruginosa***

Roslen Bondí <sup>a,#,†</sup>, Francesca Longo <sup>a,#,‡</sup>, Marco Messina <sup>a</sup>, Francesca D'Angelo <sup>a</sup>, Paolo Visca <sup>a</sup>,  
Livia Leoni <sup>a</sup>, Giordano Rampioni <sup>a,\*</sup>

Department of Science, University Roma Tre, Rome, Italy <sup>a</sup>

Running Head: Regulatory properties of the *las* QS system

\* Address correspondence to Giordano Rampioni, giordano.rampioni@uniroma3.it

# Roslen Bondí and Francesca Longo equally contributed to this work.

† Present address: Roslen Bondí, EU Reference Laboratory for *Escherichia coli*, Veterinary Public Health and Food Safety Department, Istituto Superiore di Sanità, Rome, Italy.

‡ Present address: Francesca Longo, Department of Biosciences, University of Milan, Milan, Italy.

**SUPPLEMENTAL MATERIAL**

**Table S1. Bacterial strains used in this study**

**Table S2. Plasmids used in this study**

**Table S3. Oligonucleotides used in this study**

**Table S1. Bacterial strains used in this study**

| Strains                                  | Relevant characteristics                                                                                                                                                                                                                                                                                  | Reference/Source |
|------------------------------------------|-----------------------------------------------------------------------------------------------------------------------------------------------------------------------------------------------------------------------------------------------------------------------------------------------------------|------------------|
| <i>E. coli</i>                           |                                                                                                                                                                                                                                                                                                           |                  |
| S17.1 $\lambda$ pir                      | Conjugative strain for suicide plasmids.                                                                                                                                                                                                                                                                  | 39               |
| SM10 (pFLP2)                             | Strain carrying the pFLP2 plasmid (FLP; Ap <sup>R</sup> /Cb <sup>R</sup> ) for Flp-mediated recombination.                                                                                                                                                                                                | 43               |
| <i>P. aeruginosa</i>                     |                                                                                                                                                                                                                                                                                                           |                  |
| PAO1                                     | wild type strain ATCC15692.                                                                                                                                                                                                                                                                               | ATCC             |
| PA14-R3                                  | Biosensor strain for 3OC <sub>12</sub> -HSL quantification.                                                                                                                                                                                                                                               | 49               |
| $\Delta$ vfr                             | PAO1 mutant strain with in frame clear deletion of the <i>vfr</i> gene.                                                                                                                                                                                                                                   | 37               |
| $\Delta$ rsaL                            | PAO1 mutant strain with in frame clear deletion of the <i>rsaL</i> gene, obtained by using the pDM4 $\Delta$ rsaL plasmid (Table S2).                                                                                                                                                                     | This study       |
| $\Delta$ rsaL $\Delta$ vfr               | PAO1 double mutant strain with in frame clear deletion of both the <i>rsaL</i> and <i>vfr</i> genes, obtained by using the pDM4 $\Delta$ rsaL plasmid (Table S2) in PAO1 $\Delta$ vfr.                                                                                                                    | This study       |
| $\Delta$ lasR                            | A 344 bp region encompassing the <i>lasR</i> gene, corresponding to nucleotides 1558474-1558819 of <i>P. aeruginosa</i> PAO1 genome, has been deleted from PAO1 chromosome by using the pEX18 $\Delta$ lasR plasmid (Table S2).                                                                           | This study       |
| $\Delta$ lasR $\Delta$ rsaL              | A 685 bp region encompassing the <i>lasR</i> and <i>rsaL</i> gene, corresponding to nucleotides 1558473-1559112 of <i>P. aeruginosa</i> PAO1 genome, has been deleted from PAO1 chromosome by using the pDM4 $\Delta$ lasR $\Delta$ rsaL plasmid (Table S2).                                              | This study       |
| <i>lasR</i> <sup>ind</sup>               | PAO1 $\Delta$ lasR mutant strain carrying the <i>araC</i> -P <sub>BAD</sub> <i>lasR</i> transcriptional fusion for L-arabinose-dependent induction of <i>lasR</i> , integrated into the chromosome. Generated by using the mini-CTX1- <i>araC</i> -P <sub>BAD</sub> <i>lasR</i> (Table S2).               | This study       |
| $\Delta$ rsaL <i>lasR</i> <sup>ind</sup> | PAO1 $\Delta$ lasR $\Delta$ rsaL mutant strain carrying the <i>araC</i> -P <sub>BAD</sub> <i>lasR</i> transcriptional fusion for L-arabinose-dependent induction of <i>lasR</i> , integrated into the chromosome. Generated by using the mini-CTX1- <i>araC</i> -P <sub>BAD</sub> <i>lasR</i> (Table S2). | This study       |

**Table S2. Plasmids used in this study**

| Plasmid                                              | Relevant characteristics and plasmid construction                                                                                                                                                                                                                                                                                                                                                                                                                                                                        | Reference/Source |
|------------------------------------------------------|--------------------------------------------------------------------------------------------------------------------------------------------------------------------------------------------------------------------------------------------------------------------------------------------------------------------------------------------------------------------------------------------------------------------------------------------------------------------------------------------------------------------------|------------------|
| pDM4                                                 | Suicide vector for construction of deletion mutants; <i>sacBR</i> ; <i>oriR6K</i> ; Cm <sup>R</sup> .                                                                                                                                                                                                                                                                                                                                                                                                                    | 42               |
| pDM4Δ <i>rsaL</i>                                    | pDM4-derivative plasmid for in frame clear deletion of the <i>rsaL</i> gene. The upstream (UP) and the downstream (DW) DNA regions of <i>rsaL</i> were PCR amplified from <i>P. aeruginosa</i> PAO1 genome using primers FW61G/RV62G and FW63G/RV64G, respectively (Table S3). The UP and DW PCR fragments were subsequently cloned in pDM4 by XhoI-BamHI and BamHI-XbaI restriction, respectively.                                                                                                                      | This study       |
| pEX18Δ <i>lasR</i>                                   | pEX18Tc-derivative plasmid for deletion of the <i>lasR</i> gene from nucleotides 1558474-1558819 of <i>P. aeruginosa</i> PAO1 genome.                                                                                                                                                                                                                                                                                                                                                                                    | 44               |
| pDM4Δ <i>lasR</i> Δ <i>rsaL</i>                      | pDM4-derivative plasmid for deletion of the <i>lasR</i> and <i>rsaL</i> genes from nucleotides 1558473-1559112 of <i>P. aeruginosa</i> PAO1 genome. The upstream (UP) and downstream (DW) regions of the genetic locus containing the <i>lasR</i> and <i>rsaL</i> genes was PCR amplified from <i>P. aeruginosa</i> PAO1 genome using primers FW675/RV765 and RV62G/FW61G, respectively (Table S3). The UP and DW PCR fragments were subsequently cloned in pDM4 by SpeI-BamHI and BamHI-XhoI restriction, respectively. | This study       |
| mini-CTX1- <i>araC</i> -P <sub>BAD</sub> <i>tolB</i> | mini-CTX1-derivative plasmid carrying the <i>araC</i> -P <sub>BAD</sub> <i>tolB</i> cassette from pBEM9, cloned by XhoI/EcoRI restriction.                                                                                                                                                                                                                                                                                                                                                                               | 70               |
| mini-CTX1- <i>araC</i> -P <sub>BAD</sub> <i>lasR</i> | mini-CTX1- <i>araC</i> -P <sub>BAD</sub> -derivative plasmid containing a 720 bp DNA fragment encompassing the <i>lasR</i> gene. <i>lasR</i> was PCR amplified from <i>P. aeruginosa</i> PAO1 genome using primers FW763 and RV764 (Table S3) and cloned in the mini-CTX1- <i>araC</i> -P <sub>BAD</sub> <i>tolB</i> plasmid by HindIII-EcoRI restriction.                                                                                                                                                               | This study       |
| pMP190                                               | Promoter probe vector; IncQ; 15 kb; Sm <sup>R</sup> Cm <sup>R</sup> .                                                                                                                                                                                                                                                                                                                                                                                                                                                    | 71               |

| <b>Plasmid</b>     | <b>Relevant characteristics and plasmid construction</b>                                                                                                                                                                                                                               | <b>Reference/Source</b> |
|--------------------|----------------------------------------------------------------------------------------------------------------------------------------------------------------------------------------------------------------------------------------------------------------------------------------|-------------------------|
| p <i>PlasI</i> 190 | A DNA fragment encompassing the <i>lasI</i> promoter region ( <i>PlasI</i> ) was PCR amplified and cloned in the pMP190 plasmid upstream of the promoterless <i>lacZ</i> gene.                                                                                                         | 19                      |
| p <i>PlasR</i> 190 | A DNA fragment encompassing the <i>lasR</i> promoter region ( <i>PlasR</i> ) was PCR amplified from <i>P. aeruginosa</i> PAO1 genome with primers FW324 and RV325 (Table S3) and cloned by SalI-BglII restriction in the pMP190 plasmid upstream of the promoterless <i>lacZ</i> gene. | This study              |

**Table S3. Oligonucleotides used in this study**

| Name  | Sequence (5'-3') <sup>a</sup>            | Position <sup>b</sup> | Restriction site |
|-------|------------------------------------------|-----------------------|------------------|
| FW324 | NNNACGCGT <u>TCGAC</u> GGTCGCACGCGTGGCG  | 1557812               | Sall             |
| RV325 | NNNNGGAAGATCTCAACCAAGGCCATAGCGC          | 1558166               | BglII            |
| FW675 | GGACTAGTACCTATGCGCCGCCGTTG               | 1557572               | SpeI             |
| RV676 | CGC <u>GGATCC</u> AGCGCTACGTTCTTCTTAAACT | 1558149               | BamHI            |
| RV765 | GCGGGATCCACTCGTGCTGCTTTCGCGT             | 1558454               | BamHI            |
| FW763 | TATAAGCTTATGGCCTTGGTTGACGGTTT            | 1558171               | HindIII          |
| RV764 | TATGAATTCTCAGAGAGTAATAAGACCCAAA          | 1558869               | EcoRI            |
| FW61G | CCGCTCGAGCGCATCGCCTCCAGCGT               | 1559614               | XhoI             |
| RV62G | TATGGATCCGTGTGAAGCCATTGCTCTG             | 1559111               | BamHI            |
| FW63G | TATGGATCCTTGCATTTCTATATAGAAGG            | 1558932               | BamHI            |
| RV64G | TGCTCTAGACTGGGAACCGTCCATCTAC             | 1558441               | XbaI             |

<sup>a</sup> Engineered restriction sites are underlined.

<sup>b</sup> Position with respect to *P. aeruginosa* PAO1 chromosome (www.pseudomonas.com).<sup>72</sup>

#### Additional references<sup>a</sup>:

70. A. Lo Sciuto, R. Fernández-Piñar, L. Bertuccini, F. Iosi, F. Superti and F. Imperi. The periplasmic protein TolB as a potential drug target in *Pseudomonas aeruginosa*. *PLoS One*, 2014, **9**(8), e103784. doi:10.1371/journal.pone.0103784.
71. H. P. Spaink, R. J. H. Okker, C. A. Wijffelman, E. Pees and B. J. J. Lugtenberg. Promoters in the nodulation region of the *Rhizobium leguminosarum* Sym plasmid pRL1J1. *Plant Mol. Biol.*, 1987, **9**, 27-39.
72. G. L. Winsor, D. K. Lam, L. Fleming, R. Lo, M. D. Whiteside, N. Y. Yu, R. E. Hancock and F. S. Brinkman. *Pseudomonas* Genome Database: improved comparative analysis and population genomics capability for *Pseudomonas* genomes. *Nucleic Acids Res.*, 2011, **39**, D596-600.

<sup>a</sup> Please note that other references cited in this Supplemental Material file are listed in the Reference Section of the manuscript main body.
